# Supplementary material for: Impact of age on the prognosis of patients with ventricular tachyarrhythmias and aborted cardiac arrest
Source: Springer Nature journal article supplement (doi:10.1007/s00391-022-02131-6), 2022-12-08
Supplement: MOESM1 [file 23806042]

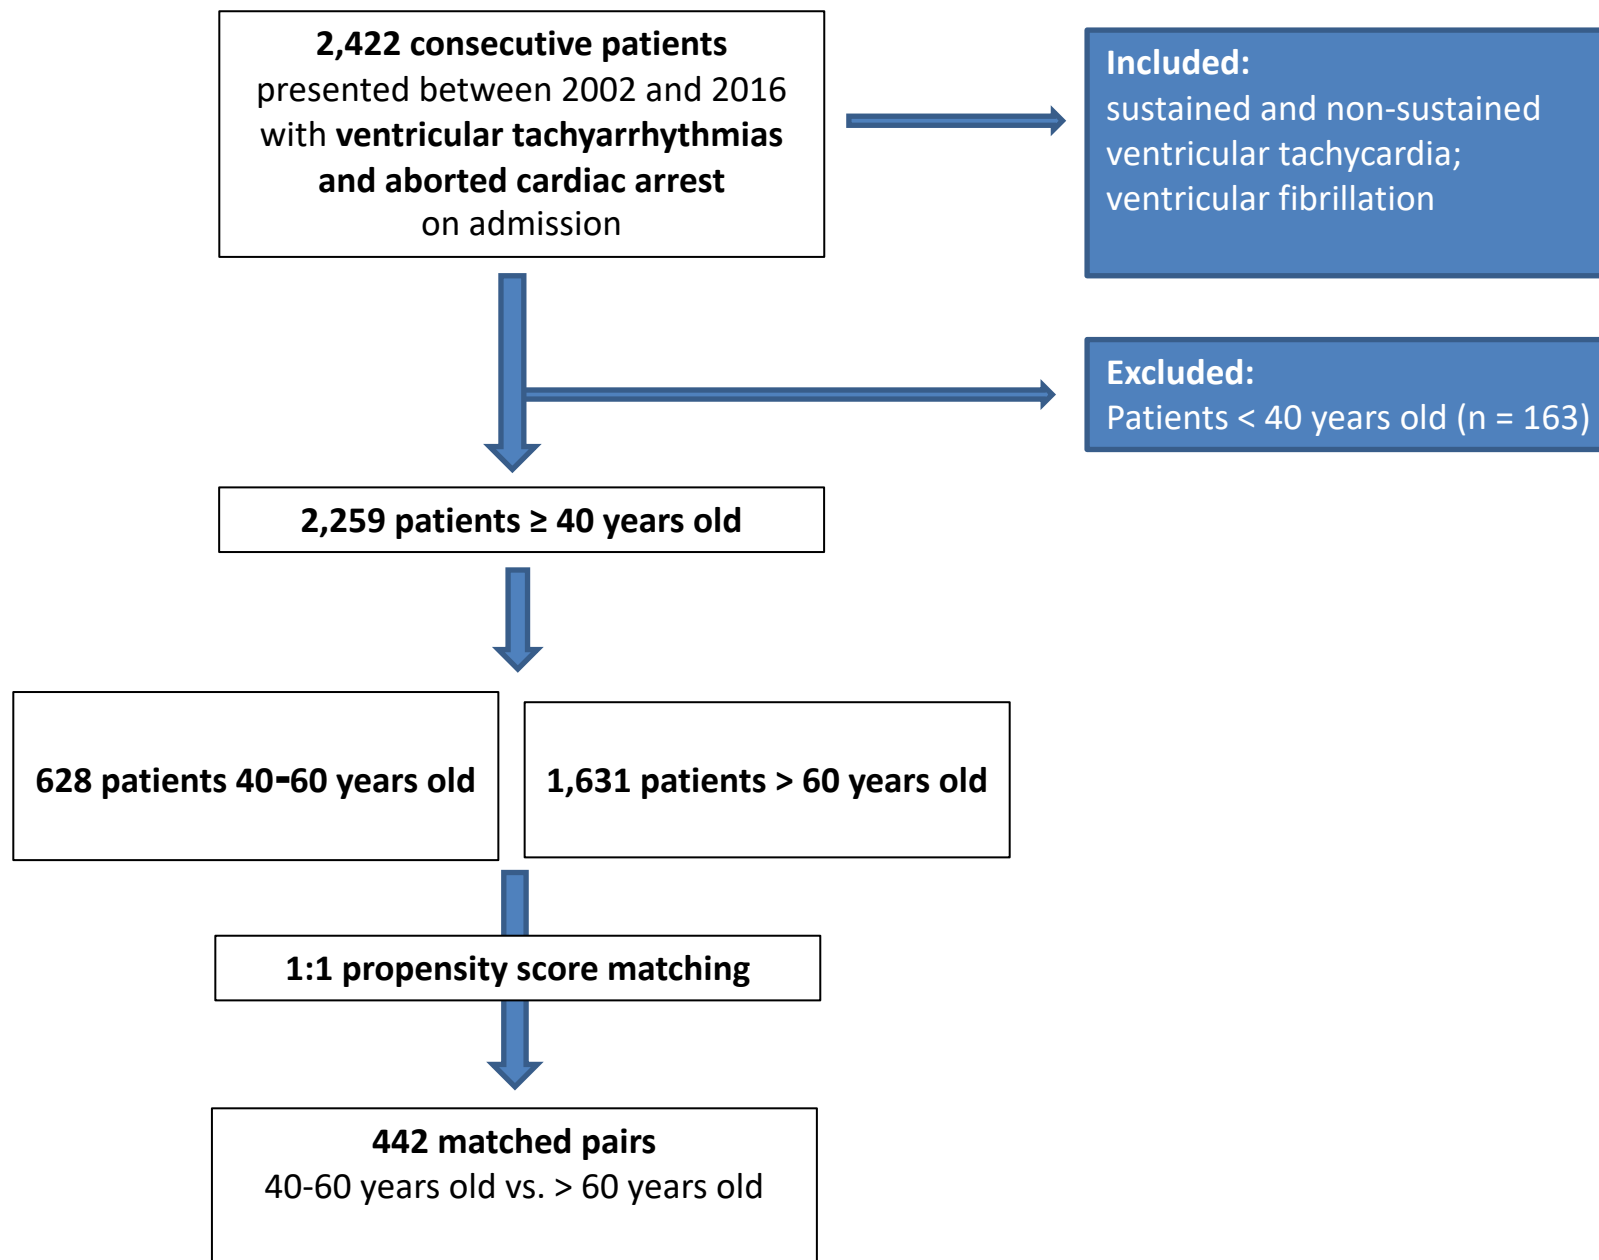

**Analyses:**

**Primary endpoint:**

- All-cause mortality at 2.5 years

**Secondary endpoints:**

- Cardiac death at 24 hours
- All-cause mortality at index hospitalization
- All-cause mortality after index hospitalization
- Composite endpoint at 2.5 years (cardiac death at 24 hours, recurrent ventricular tachyarrhythmias, appropriate ICD therapies)
