# Supplementary material for: Impact of age on the prognosis of patients with ventricular tachyarrhythmias and aborted cardiac arrest
Source: Springer Nature journal article supplement (doi:10.1007/s00391-022-02131-6), 2022-12-08
Supplement: MOESM2 [file 23806042]

after propensity score matching

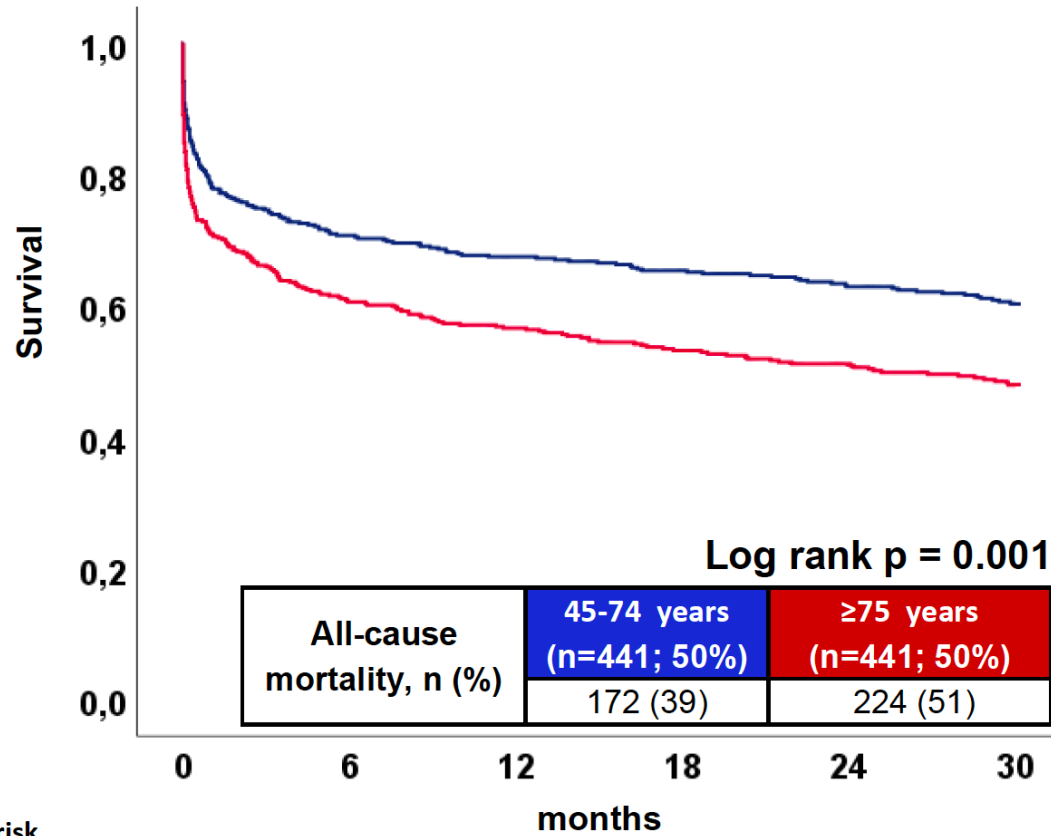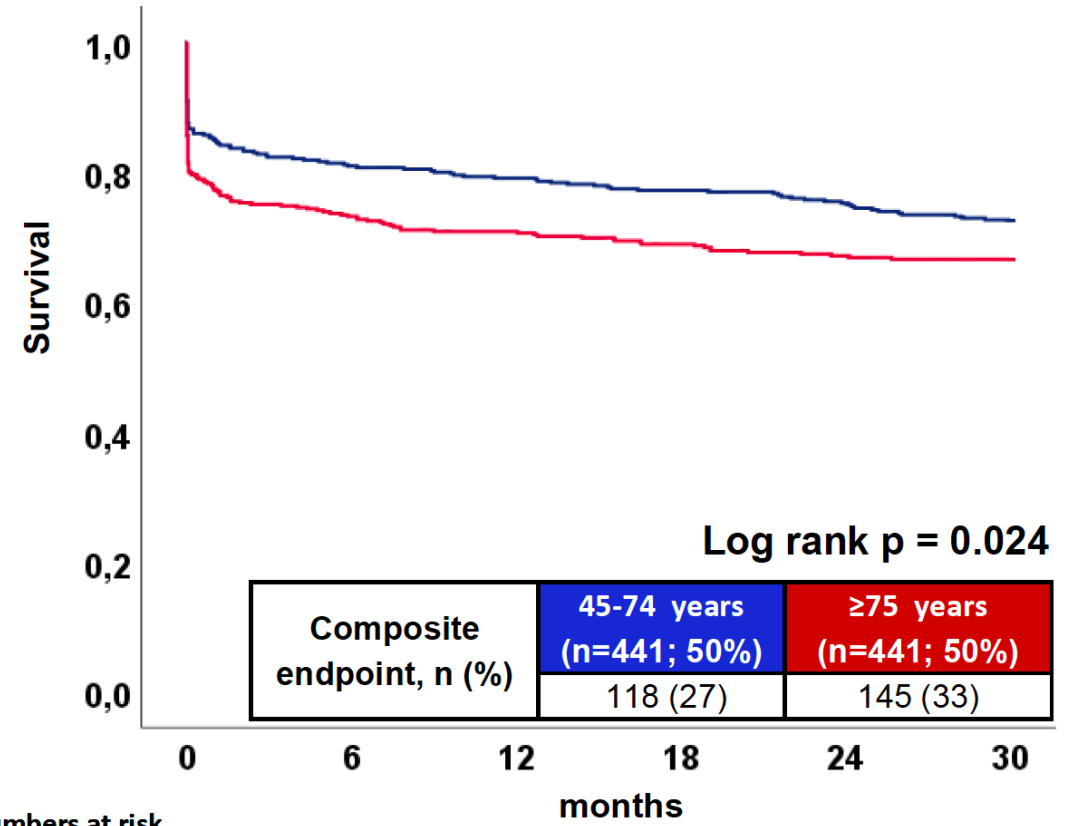

Numbers at risk

|           | 0   | 6   | 12  | 18  | 24  | 30  |
|-----------|-----|-----|-----|-----|-----|-----|
| <75 years | 441 | 307 | 289 | 273 | 252 | 236 |
| ≥75 years | 441 | 260 | 237 | 213 | 195 | 175 |

Numbers at risk

|           | 0   | 6   | 12  | 18  | 24  | 30  |
|-----------|-----|-----|-----|-----|-----|-----|
| <75 years | 441 | 351 | 338 | 321 | 299 | 281 |
| ≥75 years | 441 | 314 | 299 | 276 | 254 | 237 |
